# Supplementary material
Source: Elsevier journal article supplement (https://www.sciencedirect.com/science/article/pii/S0300289623000273)

## **Depósito de partículas inhaladas en el pulmón y su impacto clínico.**

### **Autores:**

Pere Casan Clarà (1)

Francisco Rodríguez Jerez (2)

José Belda Ramírez (3)

Cristina Martínez González (1)

(1): Universidad de Oviedo. Instituto de Investigación Sanitaria del Principado de Asturias (ISPA). Fundación para la Investigación y la Innovación Biosanitaria de Asturias (FINBA). Oviedo.

(2): Hospital Universitario Clínico San Cecilio. Servicio de Neumología. Parque Tecnológico de la Salud. Granada

(3): Fundación Fisabio. Hospital Arnau de Vilanova (Valencia). Facultad de Medicina de la Universidad Católica de Valencia. [belda\\_josram@gva.es](mailto:belda_josram@gva.es)

**Correspondencia:** [perecasanclara@gmail.com](mailto:perecasanclara@gmail.com)

## **Depósito de partículas inhaladas en el pulmón y su impacto clínico.**

### **Resumen:**

#### **Depósito de partículas inhaladas en el pulmón y su impacto clínico.**

Las partículas suspendidas en el aire que respiramos se depositan en las vías aéreas en función de diversas características de la propia partícula (forma, tamaño e hidratación), del flujo inspiratorio generado, de la anatomía de las propias vías aéreas, del ambiente donde se respira y del aclaramiento mucociliar. El estudio científico del depósito de partículas inhaladas en la vía aérea se ha venido realizando con diversos modelos matemáticos convencionales y técnicas de imagen con marcado de partículas. En los últimos años, se han producido importantes avances al añadir métodos estadísticos e informáticos generando una nueva disciplina denominada fluídica digital. Estos estudios son importantes en la clínica diaria para optimizar los dispositivos de inhalación, en función de las características particulares del fármaco a inhalar y de la patología del paciente que va a recibirlo.

### **Abstract:**

#### **Inhaler particles deposition in the lung and its clinical impact.**

Particles contained in the breathing air are deposited in the airways, according to some particle properties (shape, size and hydration), inspiratory airflow, airway anatomy, breathing environment and mucociliary clearance. Scientific study of inhaled particle deposition in airways is done by traditional mathematical models and imaging techniques with particle markers. Recently, some improvements have arrived, including statistical and informatics methods by the hand of a new discipline called digital fluidics. These studies are important in the daily clinical work by optimizing inhaler devices, according to the target drug properties and patient's pathology.

## **Introducción**

El aire que entra en los pulmones contiene moléculas gaseosas en diferentes concentraciones y, además, diversas partículas que se hallan en suspensión en este medio. Las moléculas de gas traspasan la denominada membrana alveolo-capilar en una u otra dirección, según sea su presión parcial en cada lado, mientras que las diferentes partículas inhaladas se depositan a lo largo del trayecto por el que transcurren, aunque las más pequeñas pueden también traspasar esta barrera anatómica y llegar a la sangre. El lugar exacto de depósito está en función de su tamaño, la velocidad con la que transitan, su composición química y la capacidad de adherirse en las paredes o receptores con los que se encuentran. El aparato respiratorio está dotado de un conjunto de mecanismos anatómicos y funcionales capaces de evitar que estas partículas pasen al resto del organismo y, en el caso que lo hiciesen, puedan ser neutralizadas. Todo ello forma parte de los denominados “mecanismos de defensa” de los pulmones, que se encargan de proteger al conjunto del efecto biológico (bacterias, virus, antígenos), físico (cuerpos extraños) o químico (gases irritantes o con efecto tóxico). Estos aspectos han sido ampliamente descritos en textos considerados de referencia por su amplia panorámica (1), o en magníficas revisiones recientes, publicadas en revistas de prestigio internacional (2-4). Por otra parte, los pulmones son un órgano excelente para ser un receptor de partículas para uso farmacológico y la forma inhalada es una parte importante de la administración de medicamentos. Esto puede hacerse mediante equipos sencillos y manejables, que contienen las sustancias terapéuticas en disolución o en polvo, o con una preparación previa y utilizando nebulizadores que transformen el líquido en aerosol. Los fármacos más utilizados en el primer caso pertenecen a los broncodilatadores y corticosteroides, mientras que en el segundo caso pueden administrarse también antibióticos, antivirales y otras sustancias de peso molecular elevado, sin olvidar la administración habitual de fármacos anestésicos (5).

## **Mecanismos implicados en el depósito pulmonar de partículas**

Los principales mecanismos implicados en el depósito de partículas en el pulmón pueden resumirse en los siguientes (Tabla 1):

### **Forma y tamaño de las partículas:**

La forma es un elemento que facilita o dificulta la circulación por el interior de un sistema de tuberías que van ramificándose, ya que en función que las partículas sean esféricas, espiculadas o irregulares se adherirán con más o menos dificultad a las paredes bronquiales. Algunas partículas se inhalan en complejos y agregados, que tendrán que dispersarse para alcanzar sus receptores correspondientes. En cualquier caso, será el tamaño de estas

partículas el principal condicionante para alcanzar un territorio más proximal (cercano a la atmósfera) o distal (cercano a la membrana alveolo-capilar). El tamaño ha decidido expresarse internacionalmente en lo que se denomina “Diámetro de la Masa Mediana Aerodinámica” (DMMA), que es el diámetro de una partícula de masa igual a la mediana de las partículas de una población. Sería el diámetro de partículas alrededor del cual la masa total del aerosol está igualmente distribuida (6). Este tamaño se expresa en micras y ello ha dado lugar a una nomenclatura muy utilizada alrededor de lo que se denomina “Material Particulado” o PM, que clasifica las partículas en función de este diámetro. El mecanismo de depósito de estas partículas en las vías aéreas recibe diferentes nombres (4-7) (Figura 1):

- a) *Impactación o choque*: Cuando las partículas impactan o chocan violentamente y quedan en el lugar de contacto como si se trataran de un proyectil. Este fenómeno sucede principalmente en las primeras 8-10 subdivisiones bronquiales, cuando la velocidad de entrada del aire aún es muy alta y existe un flujo turbulento. Principalmente se trata de las partículas PM-10 o superiores, que tienen grandes posibilidades de quedar depositadas en la faringe, la laringe o en las partes superiores del aparato respiratorio.
- b) *Sedimentación*: Las partículas se depositan libremente al perder su velocidad, sea cual sea el lugar donde alcancen. Actúan las fuerzas de la gravedad y el principal lugar de depósito son las porciones medias y distales de las vías aéreas, cuando el flujo disminuye y se detienen. Afecta fundamentalmente a las partículas PM-5.
- c) *Suspensión*: Este mecanismo actúa cuando las partículas experimentan movimientos erráticos y aleatorios en las zonas más distales, según sean las características físicas y químicas del medio, para finalizar depositándose o siendo expulsadas de nuevo al exterior debido a la propia respiración. El fenómeno es debido a los denominados movimientos brownianos, nombre derivado de su autor, el médico y biólogo Robert Brown (1773-1858). En este caso se afectan fundamentalmente las partículas más pequeñas o PM-0,5 y actúan también las cargas electrostáticas de las moléculas inhaladas.
- d) *Interceptación*: Se trata de un mecanismo más directamente relacionado con la inhalación de fibras, que serían detenidas inmediatamente que entraran en contacto con las paredes de las vías aéreas. Una mención especial merece las de amianto o de algunos nanotubos que, debido a su forma alargada, pueden penetrar hasta territorios muy distales y llegar a la superficie pleural.

En cualquier caso, las partículas con una DMMA igual o superior a las 10 micras, quedarán principalmente depositadas en la orofaringe y en las partes superiores de las vías respiratorias. En muchos casos estas partículas serán deglutidas hacia el tubo digestivo. Las comprendidas entre una DMMA de 5 a 10

micras quedarán fundamentalmente en las partes centrales y las con una DMMA entre 0,5 y 5 micras alcanzarán las vías periféricas y los alveolos.

### **Flujo aéreo inspiratorio**

La energía necesaria para que las partículas penetren en el interior de los pulmones procede de la contracción de los músculos respiratorios. Esta acción muscular aumenta los diámetros longitudinal y transversal del tórax y este incremento de volumen genera una presión negativa (subatmosférica) en su interior que, al estar conectado con la atmósfera, hace que se produzca la entrada de aire. El volumen de aire transcurre a una velocidad determinada y es precisamente este flujo inspiratorio el que arrastra las partículas hacia el interior. Se trata de un flujo turbulento, que es alto en las primeras divisiones bronquiales, donde actúa el citado mecanismo de impactación. A medida que el flujo va disminuyendo y se hace laminar, el depósito de partículas es inversamente proporcional al mismo, ya que el tiempo de permanencia en las vías aéreas es superior y se produce principalmente el mecanismo de sedimentación. Finalmente, en las porciones más distales, cuando prácticamente ya no existe flujo, predominan los movimientos erráticos de las partículas, que si son muy pequeñas pueden incluso alcanzar los alveolos y traspasarlos, o ser arrastradas de nuevo hacia el exterior al iniciarse el movimiento de la espiración. La apnea que se recomienda al finalizar la maniobra inspiratoria pretende, precisamente, favorecer el depósito de las sustancias inhaladas en las zonas distales, donde se busca la adhesión del fármaco a sus receptores y así potenciar su acción. Al no existir flujo de aire en ninguna dirección, se aumenta el tiempo de permanencia de las moléculas en el interior de las vías aéreas, para estar más al alcance de los mencionados receptores (5).

### **Estructura anatómica de las vías aéreas**

La estructura en forma de árbol, con sus ramificaciones perfectamente conocidas desde un tronco común, ha permitido estudiar como las partículas circulan por este territorio (4). Existen diferentes sistemas de simulación, donde las variables implicadas actúan como independientes para poder definir el lugar y la magnitud del depósito. La continua modernización de las técnicas de imagen ha facilitado también esta tarea, que ya había sido iniciada por los estudiosos de fluídica o lógica fluídica (informática aplicada a la mecánica de fluidos). Son las enfermedades de estas vías aéreas, algunas entre las más comunes (asma, EPOC), las que al modificar la estructura, ya sea con distorsiones bronquiales o con la obstrucción de las propias vías (aumento de moco, contracción), las que hacen más complicado calcular las características del depósito de partículas. La reducción del flujo espiratorio es una de las principales consecuencias de estos procesos, por lo que también se modifica el tiempo de permanencia de las partículas en el pulmón, que en función de si son dañinas o beneficiosas, se actuará en consecuencia (8).

## **Condiciones ambientales**

Las condiciones ambientales en las que se produce la respiración, juegan también un papel importante en el depósito de las partículas. De todas ellas es el grado de humedad una de las características a tener más en cuenta. La denominada higroscopicidad de cada partícula hace que pueda aumentar o disminuir de tamaño, lo que condiciona, como hemos visto, el lugar de depósito. También las condiciones de humedad en el interior del territorio bronquial puede favorecer o dificultar la adhesión de las partículas, hecho que puede resultar de gran interés para algunos fármacos, ya que puede facilitarse el alcanzar una DMMA determinada, que sea la deseable por la localización de los receptores (9).

## **Aclaramiento mucociliar**

Uno de los principales sistemas de defensa del aparato respiratorio frente a la entrada de sustancias extrañas, ya sean biológicamente activas o partículas inactivas, es el denominado "aclaramiento mucociliar". De entrada, la integridad del epitelio pseudoestratificado existente en el árbol bronquial, con una fuerte unión intercelular, evita la penetración de este material hacia la submucosa, zona inervada e intensamente vascularizada, que se encargará de facilitar su penetración más interna. La secreción permanente de moco por parte de algunas células y fundamentalmente de las glándulas, permite la adhesión del material particulado que ha penetrado, el cual es movilizado por los cilios con su batido. Las zonas nasales con un movimiento hacia el interior y las bronquiales con una movilidad hacia la glotis, lugar donde convergen moco y partículas para ser expulsadas, ya sea por la deglución o hacia el exterior mediante la tos. En función del grado de solubilidad de las partículas (hidro o liposolubles) tomarán una u otra dirección, hasta ser absorbidas o eliminadas. Las que alcanzan el territorio alveolar serán fagocitadas o harán posibles algunas modificaciones patológicas en este ambiente hematógeno (10).

## **Métodos de estudio del depósito pulmonar de partículas**

Los métodos de estudio para valorar el depósito pulmonar de las partículas inhaladas se derivan de la aplicación de modelos matemáticos a la dinámica de fluidos y éstos pueden clasificarse en: empíricos, deterministas, estocásticos, computacionales y con radioisótopos. En todos los casos, las propuestas se ajustan a un modelo pulmonar descrito por Weibel en 1963 (11). Los modelos empíricos se basan en formulaciones algebraicas obtenidas de observaciones experimentales, en muchos casos a partir del depósito nasal, oral o laríngeo. Existe un modelo de referencia, auspiciado por la International Commission on Radiological Protection (12), que usa datos teóricos, además de las características de las partículas y las condiciones ventilatorias. Estos modelos son utilizados como referencia cuando se emplean otras formas de cálculo. Los modelos deterministas utilizan formas de simulación ampliamente

empleados en ingeniería, a partir de un flujo de aire que circula por una tubería que se va ramificando sucesivamente. Los cálculos tienen en cuenta si el flujo es laminar o turbulento, pero no la forma o tamaño de las partículas inhaladas. Uno de los modelos deterministas más utilizados fue propuesto por investigadores de la Universidad de Carolina del Norte (13) y revisado recientemente con buena concordancia con observaciones experimentales (14). Los modelos estocásticos se fundamentan en una distribución al azar de las partículas inhaladas en el interior de las vías aéreas y se utilizan ampliamente para analizar el depósito del humo de los cigarrillos, partículas de diésel, tanto en experimentos en animales como en humanos. Los cálculos incluyen la estructura anatómica pulmonar, ya sean la longitud y diámetros bronquiales, los ángulos de división y el área de la sección transversal pulmonar (cross-sectional area). Los modelos computacionales, expresados por las siglas de Computational Fluid Dynamics (CFD), utilizan la facilidad de cálculo que ofrecen los ordenadores actuales para simular el movimiento de las partículas al ser inhaladas. Su base teórica son las denominadas ecuaciones propuestas por el francés Claude Navier y el irlandés George Stokes hace más de un siglo para el estudio de la dinámica de fluidos. La precisión del cálculo permite analizar el comportamiento de cada partícula en función de su velocidad y presión en un momento determinado, para de esta forma situarla en cualquier punto del espacio. Los datos así obtenidos han sido validados comparándolos con estudios experimentales y en la actualidad se utilizan para determinar la distribución de diferentes partículas en los pulmones (15-16). No obstante, el método más empleado para valorar la distribución de fármacos es el que se fundamenta en la gammagrafía y la tomografía computada por emisión de fotones (SPECT, Single Photon Emission Computerized Tomography), cuantificado a partir de imágenes bi o tridimensionales que valoran la distribución de moléculas marcadas con radioisótopos (Tecnecio-99m, Xenon-133, Carbono-11 o Fluor-18) (17).

### **Depósito pulmonar de fármacos: consideraciones prácticas**

Los métodos citados anteriormente adquieren su máximo interés para caracterizar el depósito pulmonar de las moléculas farmacológicas que se utilizan habitualmente. El campo más común es el de las enfermedades respiratorias ya que de esta forma se alcanza una rapidez de acción casi inmediata y se evitan la mayoría de los efectos secundarios que puedan deberse a una administración sistémica. Existen numerosos artilugios comerciales que contienen el fármaco ya sea disuelto o en polvo, siempre en partículas cuyo tamaño permita la llegada a las zonas más profundas del aparato respiratorio, lugar donde se ubican generalmente las principales anomalías. Debe tenerse en cuenta que los aerosoles así generados, ya sea en “cartuchos presurizados”, en polvo o generados a partir de nebulizadores, son del tipo denominado

“heterodisperso”. Es decir, no todas las moléculas tienen el mismo tamaño, aunque su distribución gaussiana proporcione una media alrededor del tamaño previsto como más adecuado para su penetración y depósito. Para ello deberán tenerse en cuenta los mecanismos de depósito citados anteriormente y también la forma como se genere el flujo inspiratorio o la apnea, imprescindible para facilitar la sedimentación del fármaco (18).

Antes de su comercialización, tanto los fármacos como sus equipos dispensadores, deben ser analizados con cualquiera de los métodos mencionados, para poder certificar los aspectos teóricos previstos para su utilización. La prescripción deberá tener en cuenta no solo el fármaco más adecuado sino las características del paciente (edad, limitaciones físicas, capacidad de aprendizaje, etcétera) e insistir siempre en la comprobación del uso correcto de los aparatos. El dispensador ideal de fármacos en inhalación no existe y, por el contrario, disponemos de una amplísima variedad de modelos comerciales. Las exigencias motivadas por el cambio climático y el uso de sustancias hidro-fluoro-carbonadas (HFC), que actúan como propelentes en algunos tipos de cartucho presurizado, y que deberían ser sustituidas por otras sustancias que no faciliten el efecto invernadero (19), hace necesaria una reflexión conjunta de todos los fabricantes, médicos y usuarios. En algunos países, donde existen empresas propias que suministran este tipo de medicación, el uso de estos propelentes es prácticamente inexistente. En cualquier caso, la administración de aerosoles en polvo está bien documentada y extendida y disponemos de sustitutos para la medicación más habitualmente utilizada. Para las nuevas sustancias que podrían beneficiarse de la administración nebulizada, también disponemos de equipos con diferentes maneras de producir aerosoles, que son sencillos de utilizar, económicos y que permiten una buena utilización de las ventajas de esta vía. En una reciente publicación, Sandra Anderson y cols (5), han realizado una excelente revisión del pasado, presente y futuro de la medicación inhalada, con una exhaustiva relación de los fármacos más utilizados por esta vía.

### **Inhaladores en cartucho presurizado (MDI)**

Los inhaladores en forma de cartucho presurizado, denominados también MDI, son dispositivos para la administración de medicamentos en aerosol ampliamente utilizados en todo el mundo. En España se dispensan anualmente unos 15 millones de unidades, lo que constituye casi el 50% de todos los fármacos disponibles en aerosol. Su configuración permite la salida de una dosis fija en cada maniobra, gracias a una válvula de precisión que controla la salida de partículas, de un tamaño entre 2-4 micras (20). El equipo dispone de una cámara metálica donde se deposita el fármaco en solución, con un propelente líquido, generalmente Clorofluorocarbono (CFC), sustituido en los últimos tiempos por Hidrofluorocarbono (HFA). Al salir al exterior (temperatura ambiente y presión atmosférica), el propelente pasa a estado gaseoso y arrastra consigo el



fármaco (Figura 2). Si el disparo se hace coincidir con una inspiración profunda, todo el contenido penetra en el interior de las vías aéreas. Su introducción supuso un gran avance en la administración de fármacos, tanto en el caso de los broncodilatadores (21) como en el de los corticoides (22). Precisamente es en la sincronización entre la inspiración del paciente y la salida del fármaco donde reside la mayor dificultad en el manejo de este tipo de inhaladores (23), por otra parte fácil de utilizar, transportables y seguros. Para mejorar sus inconvenientes se han diseñado cámaras espaciadoras (Figura 2), que se colocan entre el equipo y la boca del paciente y que resultan especialmente útiles en niños (24). De cualquier forma, una gran parte de las partículas inhaladas se depositan en la orofaringe y tan solo un 15-20% alcanzan el territorio bronquial más distal (25). Otro de los inconvenientes de estos equipos es el denominado efecto “frío-freón”, más evidente con los propelentes de CFC que con los de HFA (26). Este efecto consiste en la interrupción de la inspiración con la llegada de las partículas frías a la faringe y se reduce también de forma notable con el uso de las cámaras interpuestas. En los últimos años se utilizan propelentes de este segundo tipo, en concreto el HFA134a, con menor efecto invernadero en la atmósfera terrestre. La introducción de partículas de menor MMAD (1-2 micras), especialmente en algunos corticosteroides, ha permitido también que el depósito pulmonar sea muy superior al habitual, alcanzando cifras cercanas al 50% (27).

Todas las sociedades científicas neumológicas, tanto las nacionales como las internacionales, han desarrollado carteles, artículos de divulgación y todo tipo de material para facilitar el aprendizaje de las maniobras de inhalación con los MDI (28,29). La necesidad de realizar una serie de movimientos muy precisos para que el producto pueda llegar a su destino, obliga a que los pacientes sean convenientemente instruidos y examinados sobre la corrección de las maniobras (23). Además, es necesario que los pacientes desarrollen un flujo inspiratorio no menor de unos 30 L/min<sup>-2</sup>. Uno de los pasos más importantes es que se realice una apnea postinspiratoria para facilitar la sedimentación del fármaco, además de la necesaria coordinación entre el disparo y la inspiración. A tal efecto se han fabricado equipos (Autohaler, Easyhaler) que se disparan automáticamente al iniciar la maniobra y que mejoran el depósito pulmonar (30,31).

Debido al aumento de la temperatura terrestre y a las evidencias sobre el cambio climático, en los últimos años han surgido opiniones y movimientos para sustituir los inhaladores MDI, ya que los propelentes que contienen participan también en el aumento del efecto invernadero. La Agencia Española de Medicamentos y Productos Sanitarios, ha presentado recientemente una nota informativa (32) en la que se adhiere a las indicaciones de las Sociedades Científicas, aunque con un punto de prudencia sobre su sustitución inmediata por inhaladores en polvo.

## **Inhaladores en polvo**

Los inhaladores en polvo se utilizan desde la antigüedad, aunque fueron desarrollados en forma comercial a partir de la aparición del Cromoglicato Disódico (33), que se administraba en un cartucho denominado Spinhaler. Estos fármacos en polvo debían ser introducidos a partir del flujo generado por la inspiración profunda del paciente, por lo que se evitaba la coordinación necesaria entre el disparo del MDI y la maniobra inspiratoria. La fuerza de succión generada permitía la entrada del polvo, cuya dosis previamente se había depositado en una cámara de entrada o en un blister, que debía perforarse. Esta forma de dispensación se extendió rápidamente a otro tipo de fármacos (broncodilatadores y corticoides), que depositaban el medicamento en una cámara de dosificación o en tiras de blister sellados. Se desarrollaron sistemas monodosis y multidosis para facilitar su utilización, que rápidamente se hizo muy popular (Turbuhaler, Accuhaler, Breezhaler). Este tipo de dispositivos evitaba también la utilización de propelentes, con el subsiguiente apoyo a las recomendaciones internacionales que intentan evitar el acúmulo de gases atmosféricos con efecto invernadero. Al principio los inhaladores en polvo fueron cuestionados, ya que los pacientes no perciben la entrada del medicamento y en algunos casos se presumía que el término “aerosol” pudiera ser extensivo al polvo en suspensión. Otro de sus enemigos es que la humedad puede aglomerar la medicación en polvo, por lo que deben mantenerse siempre en un ambiente seco. No obstante los equipos son absolutamente herméticos y resulta muy difícil que la atmósfera entre en contacto con la sustancia, al menos hasta que no es extraída para ser inhalada (34).

El tamaño de las partículas generadas con este tipo de dispensadores es similar a los del MDI, por lo que la penetración pulmonar es muy parecida y, en algunos casos, algo superior, alcanzando el 20-30% del total del aerosol de la dosis. En aquellos pacientes incapaces de generar el suficiente flujo inspiratorio pueden resultar menos adecuados, pero con unos 30 L/min<sup>-2</sup> el medicamento alcanza sus receptores y se produce el efecto deseado (35). El fármaco se encuentra generalmente mezclado con agregados de glucosa, por lo que la maniobra inspiratoria debe dispersarlo y hacer que las pequeñas partículas penetren hacia el interior de los bronquios (36).

Este tipo de dispensadores se han generalizado en los últimos años y forman parte de los más utilizados para el tratamiento de las enfermedades respiratorias más comunes. Existe un amplio arsenal de equipos, tanto en sistema monodosis, en los que debe introducirse una cápsula que contiene el polvo micronizado, como sistema multidosis, en cuyo caso el fármaco se halla depositado en su interior y la dosis se obtiene previamente a cada disparo. El sistema es muy útil y práctico para la población general, con las únicas

salvedades de personas que por su edad (niños o ancianos) o por imposibilidad de generar el flujo inspiratorio adecuado, no puedan beneficiarse y deba recurrirse a otro tipo de dispensador (5).

### **Nebulizadores**

Se denomina nebulizador a un aparato capaz de convertir un líquido en aerosol. Existen nebulizadores de diferentes tipos, pero los más habituales para el uso médicos son los denominados de tipo “jet” y los “ultrasónicos”. Los nebulizadores “jet” se fundamentan en el efecto descrito por Daniel Bernoulli (1700-1782), según el cual cuando un gas circula por un tubo y se reduce el diámetro del mismo, se produce un aumento de la velocidad de salida, lo cual genera un fenómeno de succión al reducirse la presión. Si este punto de salida entra en contacto con una superficie líquida, se produce la emisión de partículas del mismo en forma de gotas en suspensión. Si esta zona se une mediante una mascarilla a las vías respiratorias de un paciente, se facilita la entrada del fármaco nebulizado hacia su interior. En la mayoría de estos equipos, la producción de aerosol se genera únicamente durante la maniobra inspiratoria, por lo que se evita el consumo de fármaco cuando no es útil (37). Los nebulizadores “ultrasónicos” utilizan un vibrador piezoeléctrico que oscila a una determinada frecuencia (generalmente entre 2-3 millones de veces /segundo) y convierte la superficie líquida de un depósito en aerosol (38). Los primeros pueden convertir en aerosol cualquier líquido en el que esté disuelto el fármaco, mientras que los segundos pueden ser más ineficaces si la solución es más viscosa (39).

Este tipo de dispensadores, de los que existen una amplia representación comercial, permiten administrar la medicación sin la cooperación tan detallada de los anteriores equipos MDI o en polvo. No obstante se requiere que el paciente esté correctamente conectado y mantenga una respiración entre 6-8 L/min, que puede realizarse en reposo y con una cadencia respiratoria habitual. Con este tipo de artilugios se produce una gran pérdida de fármaco, que se adhiere a las paredes del equipo y a las tubuladuras o se deposita en la atmósfera circundante. Se ha calculado que únicamente entre un 10-15% del total de la dosis penetra en las vías aéreas (40). Este depósito puede mejorarse si se realiza un tipo de respiración con inspiraciones profundas seguidas de apnea para, como se ha comentado, facilitar el depósito por sedimentación (41). Otro elemento a valorar es que se producen partículas de tamaño muy diversos, por lo que las mayores se depositan en el fondo del equipo o en la boca y faringe del paciente, donde será muy necesario realizar las maniobras de limpieza posterior para reducir la absorción oral.

Disponemos de maneras muy sencillas de generar aerosoles. Una de ellas consiste en generar la presión aérea, similar al efecto “jet”, mediante la simple presión manual sobre una pera de goma, que esté en contacto con la

superficie líquida. Si colocamos una simple boquilla a la salida del recipiente podremos inhalar el líquido del depósito una vez convertido en aerosol. El modelo más utilizado es el tipo DeVilbiss, fácil de manejar, sencillo y económico. Otra posibilidad comercializada de disponer de medicación en aerosol es el sistema Respimat, patentado por la empresa Boehringer Ingelheim, que consiste en una suspensión de “niebla suave” obtenida mediante la energía mecánica generada por un resorte que comprime el fármaco. La suspensión pasa a través de un filtro con más de 1000 orificios, que conduce el aerosol de una manera suave hacia el exterior, para ser inhalada de una manera sencilla con la respiración del paciente. Las partículas obtenidas oscilan entre 2-5 micras, con lo que se alcanza un depósito pulmonar muy elevado, superior en muchos casos al 50% emitido (42).

### **Posibilidades terapéuticas en aerosol**

Las posibilidades de administrar medicamentos en aerosol son muy amplias. Existen numerosas presentaciones, ya sea en el formato donde dispensador y fármaco son parte de un mismo equipo (con presentación en MDI o en polvo), o en formas separadas, donde para obtener el aerosol debemos utilizar un artilugio aparte, generalmente en forma de nebulizador comercial. Disponemos de broncodilatadores del tipo agonistas adrenérgicos Beta-2, con una amplísima representación (Adrenalina, Salbutamol, Terbutalino, Levalbuterol, Fenoterol, Formoterol, Indacaterol, Olodaterol y Salmeterol), agrupados en los denominados SABA (de acción corta) o LABA (de acción larga y mantenida). Otro grupo de fármacos broncodilatadores lo constituyen los antagonistas de los receptores muscarínicos (Ipratropio, Tiotropio, Glicopirronio, Acilidinio, y Umeclidinio), también distribuidos entre acciones cortas y largas y muy utilizados, especialmente en la EPOC. Un aspecto que resultó trascendental para el tratamiento del asma lo constituyen los corticosteroides en inhalación. En este campo disponemos también de amplias posibilidades (Beclometasona, Budesonida, Ciclesonida, Flunisolide, Fluticasona Furoato, Fluticasona Propionato y Mometasona Furoato), que cubren tanto los de corta duración como los de larga, así como solos o asociados con los diferentes broncodilatadores mencionados. Estas asociaciones existen también para los broncodilatadores de diferentes grupos de acción. En el ámbito de las denominadas “cromonas” disponemos de Cromoglicato Sódico y Nedocromil, fármacos que actúan de forma preventiva en el asma y otros procesos alérgicos. Como medicamentos contra las infecciones existen preparados de amplia actuación (Aztreonam, Levofloxacino, Colistina y Amikacina). También disponemos de inhibidores de la Neuraminidasa (Zanamivir y Laninamivir), Ribavirina como tratamiento del *Virus Respiratorio Sincitial*, Pentamidina para el *Pneumocystis jiroveci*. Para el manejo de la fibrosis quística puede administrarse Desoxiribonucleasa humana recombinante (rhDNase) en aerosol y utilizando diferentes nebulizadores comerciales (Marquest Acorn II, Hudson T Up-Draft II, Pari LC Jet Plus, Medic-Aid Sidestream), todos ellos con una producción de partículas de un tamaño que

oscila entre 2-5 micras de MMAD. Las pruebas de provocación bronquial, generalmente realizadas con inhalación de Metacolina, Histamina, Adenosina o Carbachol, pueden también hacerse con una preparación de Manitol comercializada en polvo. Para el tratamiento de la hipertensión arterial pulmonar disponemos de la posibilidad de utilizar Prostaciclina inhalada y podemos también administrar surfactante pulmonar en instilación para el Síndrome de Distress Respiratorio que curse con su déficit. Finalmente, existe una amplia posibilidad de administrar otras sustancias por vía inhalatoria (Nicotina en diferentes formatos, Loxapine y Levodopa). La Insulina se utilizó en diferentes ensayos con un buen éxito inicial y posteriormente fue retirada debido a diferentes efectos secundarios.

Varias compañías farmacéuticas están ensayando diversas posibilidades de administrar fármacos por vía inhalatoria para tratar diferentes enfermedades. Entre ellos podemos destacar algunas citosinas (GM-CSF), agentes quimioprotectores como la Tretionina, Interferón Beta1a, antiparásitos como Ivermectin, antifúngicos como Itraconazol y Voriconazol, antibióticos como Teicoplanin, antrifibróticos como la Pirfenidona y una amplia variedad de fármacos con múltiples actividades (5). En España disponemos de un registro nacional sobre estas indicaciones (43) y es de esperar un rápido avance en conocer nuevas moléculas o desarrollar una mejor forma de administrar las actuales. En cualquier caso, la vía inhalatoria permite cumplir uno de los más antiguos aforismos de la medicina, actuar con eficacia y con el mínimo daño posible. Al tratarse de dosis pequeñas y dirigidas directamente a su punto de acción, la relación beneficio/riesgo es óptima en la mayoría de las circunstancias. Por este motivo deberán cuidarse exquisitamente las indicaciones para un buen uso de este tipo de medicación, verdadera clave del éxito o fracaso del tratamiento indicado (Tabla 2).

## Referencias

1. Rosati JA, Isaacs KK, Martonen TB. Mechanisms of particle deposition. En: *Aerosols Handbook. Measurement, dosimetry, and health effects*. Ed. Lev S. Ruzer and Naomi H. Harley. CRC Press. Taylor & Francisc Group, LLC. Second Edition. Boca Ratón, 2013. Pp 47-74
2. Islam MS, Saha SC, Sauret E, Gu YT, Ristovski ZD. Numerical investigation of aerosol particle transport and deposition and realistic lung airway. *Proceedings of the international conference on computational methods*. Queensland University of Technology. Brisbane, 2015. <http://www.sci-en-tech.com/ICCM2015/ICCM2015-Proceedings.pdf>
3. Phalen RF, Raabe OG. The evolution of inhaled particle dose modeling: A review. *Journal of Aerosol Science* 2016;99:7-13
4. Bui VKH, Moon JY, Chae M, Park D, Lee YC. Prediction of aerosol deposition in the human respiratory tract via computational models: A review with recent updates. *Atmosphere* 2020;11:1-27. doi:10.3390/atmos11020137
5. Anderson S, Atkins P, Bäckman P, Cipolla D, Clark A, Daviskas E, et al. Inhaled medicines: past, present, and future. *Pharmacol Rev* 2022;74:48-118. <https://doi.org/10.1124/pharmrev.120.000108>
6. Fuchs NA. *The mechanics of aerosols*. Pergamon Press. New York, 1964
7. Rostami AA. Computational modeling of aerosol deposition in respiratory tract: A review. *Inhal Toxicol* 2009;21:262-90
8. Chakravarty A, Panchagnula MV, Mohan A, Patankar NA. Pulmonary drug delivery and retention: A computational study to identify plausible parameters based on a coupled airway-mucus flow model. *PloS Comput Biol* 2022;18:1-15. <https://doi.org/10-1371/journal.pcbi.1010143>.
9. Nemati H, Saidi MS, Hosseini V. Modeling particle deposition in the respiratory system during successive respiratory cycles. *Scientia Iranica B*. 2020;27:215-28. Doi: 10.24200/sci.2019.21269
10. Cidem A, Bradbury P, Traini D, Ong HX. Modifying and integrating in vitro and ex vivo respiratory models for inhalation drug screening. *Front Bioeng Biotechnol* 2020;8:581995. Doi: 10.3389/fbioe.2020.581995.
11. Weibel E. *Morphometry of the Human Lung*, Academic Press, New York, NY, USA, 1963
12. Commission on Radiological Protection, ICRP Publication 66, Human Respiratory Tract Model for Radiological Protection. *Ann ICRP* 1994;24:1-3

13. Rudolf G, Kobrich R, Stahlhofen W. Modeling and algebraic formulation of regional aerosol deposition in man. *J Aerosol Sci.* 1990;21:S403-5
14. Choi JI, Kim CS. Mathematical analysis of particle deposition in human lungs: an improved single path transport model. *Inhal Toxicol.* 2007;19: 925-39. doi: 10.1080/08958370701513014
15. Fernández Tena A, Casan Clarà P. Uso de la dinámica de fluidos computacional en medicina respiratoria. *Arch Bronconeumol* 2015;51:293-8. doi: 10.1016/j.arbres.2014.09.005.
16. Seregin G, Šverák V. On global weak solutions to the Cauchy problem for the Navier-Stokes equations with large  $L^3$ -initial data. *Nonlinear Analysis* 2017;154:269-96. doi: 10.1016/j.na.2016.01.018.
17. Ruzer LS. Radioactive aerosols. En *Aerosols Handbook. Measurement, dosimetry, and health effects*. Ed. Lev S. Ruzer and Naomi H. Harley. CRC Press. Taylor & Francisc Group, LLC. Second Edition. Boca Ratón, 2013. Pp383-413
18. Rau JL. The inhalation of drugs: advantages and problems. 2004 Philip Kittredge Memorial Lecture. *Respir Care* 2005;50:367-82
19. Wouters OJ, Feldman WB, Phil D, Tu SS. Product hopping in the drug industry-lessons from Albuterol. *N Engl J Med* 2022;387:1153-6. doi: 10.1056/NEJMp2208613
20. Altshuler B, Yarmus L, Palmes ED, Nelson N. Aerosol deposition in the human respiratory tract. I. Experimental procedures and total deposition. *Arch Ind Health* 1957;15:293-303
21. Cullum VA, Farmer JB, Jack D, Levy GP. Salbutamol: a new selective Beta-adrenoceptive receptor stimulant. *Br J Pharmac* 1969;35:141-51
22. Morrow Brown H, Storey G, George WHS. Beclomethasone Dipropionate: A New Steroid Aerosol for the Treatment of Allergic Asthma. *Brit Med J.* 1972;1:585-90
23. Sanchis J, Gich I, Pedersen S, on behalf of the Aerosol Drug Management Improvement Team (ADMIT). Systematic Review of Errors in Inhaler Use Has Patient Technique Improved Over Time. *CHEST* 2016; 150:394-406
24. Burudpakdee Ch, Kushnarev V, Coppolo D, Suggett JA. A Retrospective Study of the Effectiveness of the AeroChamber Plus Flow-Vu Antistatic Valved Holding Chamber for Asthma Control. *Pulm Ther* 2017;3:283-96. DOI 10.1007/s41030-017-0047-1
25. Newman SP, Clarke SW. Therapeutic aerosols I - physical and practical considerations. *Thorax* 1983;38:881-6

26. Gabrio BJ, Stein SW, Velasquez DJ. A new method to evaluate plume characteristics of hidrofluoroalkane and chlorofluorocarbon metered dose inhalers. *Int Pharm.* 1999;186:3-12
27. Leach ChL, Bethke TD, Hasselquist BE, Drollmann A, Davidson P, Wurst W. Bidimensional and Three-Dimensional Imaging Show Ciclesonide Has High Lung Deposition and Peripheral Distribution: A Nonrandomized Study in Healthy Volunteers. *J Aerosol Med* 2006;19:117-26
28. GEMA 5.2. Guía Española para el Manejo del Asma. 2022. [Www.gemasma.com](http://www.gemasma.com)
29. GINA. Global Strategy for Asthma Management and Prevention. 2022. [www.ginasthma.com](http://www.ginasthma.com)
30. Giner J, Basualdo LV, Casan P, Hernández C, Macián V, Martínez I. et al. Normativa sobre la utilización de fármacos inhalados. *Arch Bronconeumol* 2000;36:34-43
31. Oliveira C, Muñoz A, Doménech A. Terapia nebulizada. Año SEPAR. *Arch Bronconeumol.* 2014;50:535-45
32. Ministerio de Sanidad. Agencia Española de Medicamentos y Productos Sanitarios. Ref. MUH 09/2022. [www.aempos.gob.es](http://www.aempos.gob.es)
33. Warner JO. The place of Intal in paediatric practice. *Respir Med* 1989;83:33-7
34. Labiris N, Dolovich M. Pulmonary drug delivery. Part II: The role of inhalant delivery devices and drug formulations in the therapeutic effectiveness of aerosolized medications. *Br J Clin Pharmacol* 2003;56:600-12
35. Taburet AM, Schmit B. Pharmacokinetic optimization of asthma treatment. *Clin Pharmacokinet* 1994;26:397-418
36. Concessio NM, Van Oort MM, Knowles MR, Hickey AJ. Pharmaceutical dry powder aerosols: correlation of powder properties with dose delivery and implications for pharmacodynamic effect. *Pharm Res* 1999;16:828-34
37. Suggett J, Mark N, Cathy D, Rubina A, Mitchell J. Delivery of medication by breath-actuated nebulizer (BAN) is similar when used with differing inhalation/exhalation ratios: a contrast to breath enhanced nebulizer (BEN) behavior. *Eur Respir J* 2014;44:3819
38. Mermet JM, Pobin JP. Ultrasonic nebulizer for easily changing sample solutions. *Anal Chem* 1968;40:1918-20
39. Newman SP. A comparison of lung deposition patterns between different asthma inhalers. *J Aerosol Med* 1995;8 (suppl 3):S21-6



40. O'Callaghan C, Barry PW. The science of nebulized drug delivery. *Thorax* 1997;52(suppl 2):S31-44
41. Newman SP. Aerosol deposition considerations in inhalation therapy. *Chest* 1985;88 (suppl 1):S152-60
42. Newman SP. Aerosols, soft mist inhaler. En: *Encyclopedia of Respiratory Medicine, Science Direct Topics* (Laurent JG and Shapiro SD eds) Elsevier, Amsterdam, The Netherlands. 2006;pp 58-64
43. Máiz-Carro L, Blanco-Aparicio M. Nuevos antibióticos inhalados y formas de administración. *Open Respir Arch.* 2020; 2(3):251-264. doi:<https://doi.org/10.1016/j.opresp.2020.05.006>

## **Tabla 1**

### **Mecanismos implicados en el depósito de partículas en el pulmón**

**Forma y tamaño de las partículas**

**Flujo aéreo inspiratorio**

**Estructura anatómica de las vías aéreas**

**Condiciones ambientales (temperatura, humedad)**

**Aclaramiento mucociliar**

**Tabla 2**                    **Indicaciones esenciales para el buen uso de los inhaladores**

**MDI**

1. Preparar el equipo y colocarlo en posición vertical
2. Sacar el tapón y agitar adecuadamente
3. Vaciar los pulmones de aire
4. Colocar el dispensador en la boca
5. Iniciar la maniobra de inspiración
6. Presionar el inhalador y seguir cogiendo aire de forma mantenida (simultáneamente)
7. En los equipos con autodisparo se activará directamente con la maniobra
8. Aguantar la respiración en apnea durante unos 5-10 segundos
9. Sacar el aire lentamente
10. Guardar el dispensador y si es necesario enjuagar la boca con agua

**MDI + cámara espaciadora**

1. Preparar el equipo, sacar el tapón, agitarlo y colocarlo en un extremo de la cámara
2. Vaciar los pulmones de aire y colocar la cámara por el otro extremo en la boca
3. Realizar los disparos indicados por la prescripción dentro de la cámara
4. Realizar 4-5 inspiraciones lentas y mantenidas
5. Aguantar la respiración en apnea unos 5-10 segundos
6. Sacar el aire lentamente
7. Tapar y guardar el equipo y limpiar la cámara según indicaciones

**Inhalador en polvo**

1. Preparar el equipo y colocarlo en la posición indicada frente a la boca
2. Efectuar la carga según sea el equipo (cápsula, rotación, blister)
3. Vaciar los pulmones de aire
3. Colocar el dispensador en la boca
4. Efectuar la inspiración en la forma recomendada por cada equipo (generalmente intensa)
5. Aguantar la respiración en apnea durante 5-10 segundos
6. Sacar el aire lentamente
7. Guardar el dispensador y si es necesario enjuagar la boca con agua

**Figura 1**

**Mecanismos de depósito de las partículas en el pulmón**

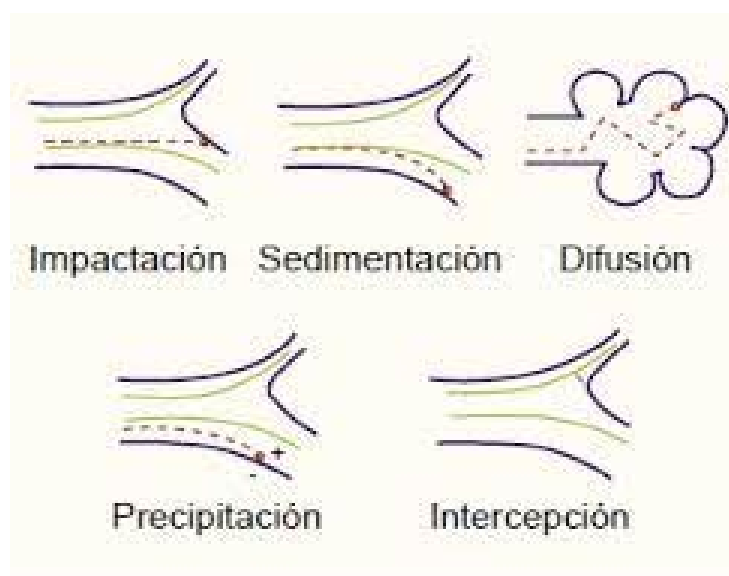

## **Figura 2**

### **Inhalador MDI y cámara espaciadora**

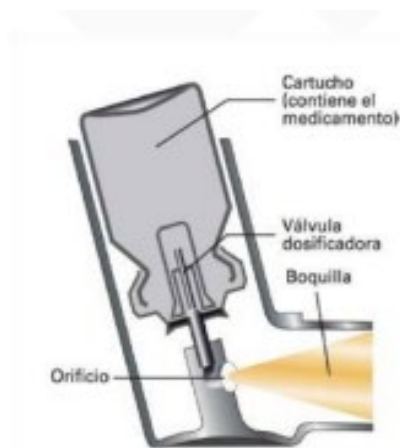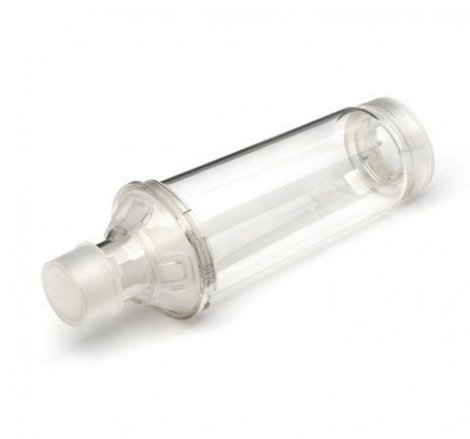

Supplement: mmc1 [file S0300289623000273:mmc1.pdf]
